# Supplementary material
Source: PubMed Central journal article supplement (PMC7439708)
Supplement: ao0c02850_si_001.pdf [file ao0c02850_si_001.pdf]

# SUPPORTING INFORMATION

## **Oleic Acid, Cholesterol, and Linoleic Acid as Angiogenesis Initiators**

Faith Pwaniyibo Samson<sup>1</sup>, Ambrose Teru Patrick<sup>1</sup>, Tosin Esther Fabunmi<sup>1</sup>,  
Muhammad Falalu Yahaya<sup>1</sup>, Joshua Madu<sup>1</sup>, Weilue He<sup>2</sup>, Srinivas R. Sripathi<sup>3</sup>,  
Jennifer Tyndall<sup>4</sup>, Hayatu Raji<sup>4</sup>, Donghyun Jee<sup>5</sup>, Diana R. Gutsaeva<sup>6</sup>, and Wan Jin Jahng<sup>1\*</sup>

<sup>1</sup>Department of Petroleum Chemistry, American University of Nigeria, Yola, Nigeria

<sup>2</sup>Department of Biomedical Engineering, Michigan Technological University, Houghton, USA

<sup>3</sup>Department of Ophthalmology, The Johns Hopkins University, Baltimore, USA

<sup>4</sup>Department of Natural and Environmental Sciences, American University of Nigeria, Yola, Nigeria

<sup>5</sup>Department of Ophthalmology and Visual Science, St. Vincent's Hospital, College of Medicine, The Catholic University of Korea, Suwon, Korea

<sup>6</sup>Department of Ophthalmology, Augusta University, Augusta, GA, USA

\*Correspondence to Wan Jin Jahng, Ph.D.

Email address: [wan.jahng@aun.edu.ng](mailto:wan.jahng@aun.edu.ng)

Phone number: +234-805-550-1032

Figure S1

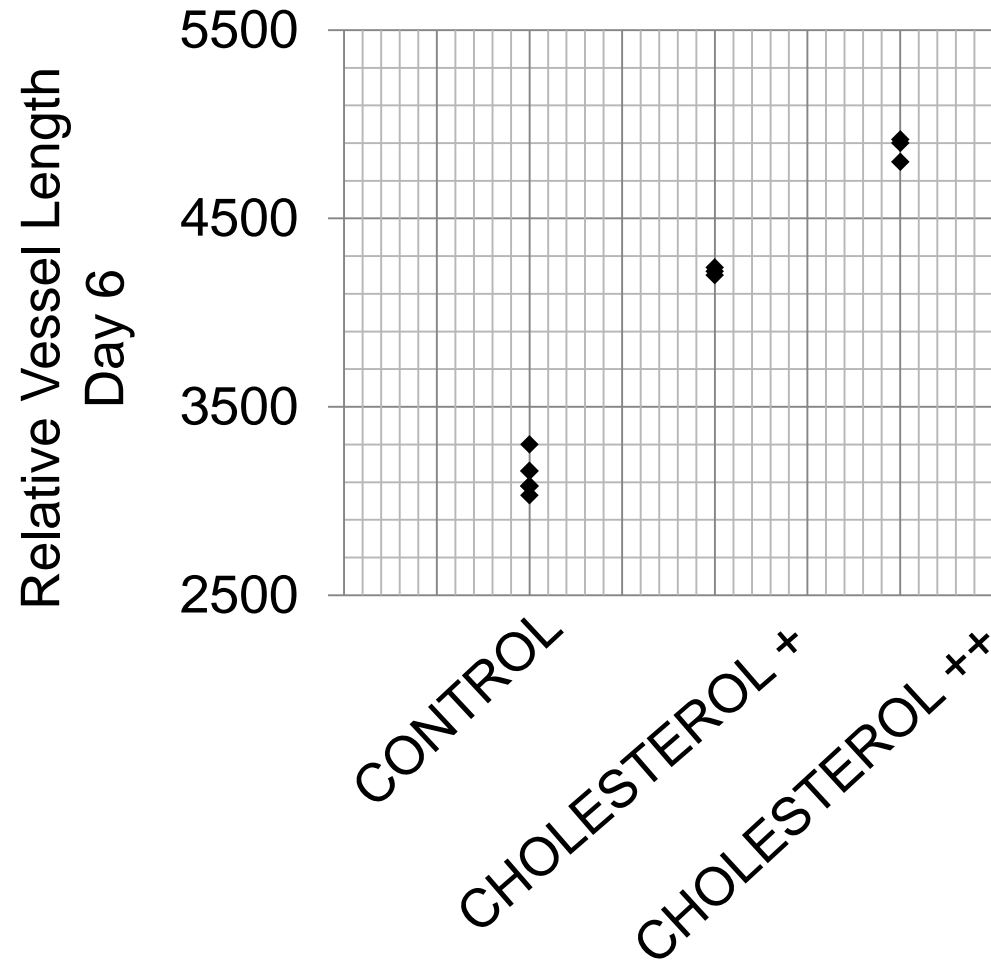

**Figure S1.** Angiogenic analysis of vessel morphology. Vessel length was analyzed quantitatively using the angiogenic index. Vessel length is shown on control, cholesterol + (55 mg), and cholesterol ++ (110 mg) at day=6 (preincubation day=2 and post-injection of cholesterol day=4).

Figure S2

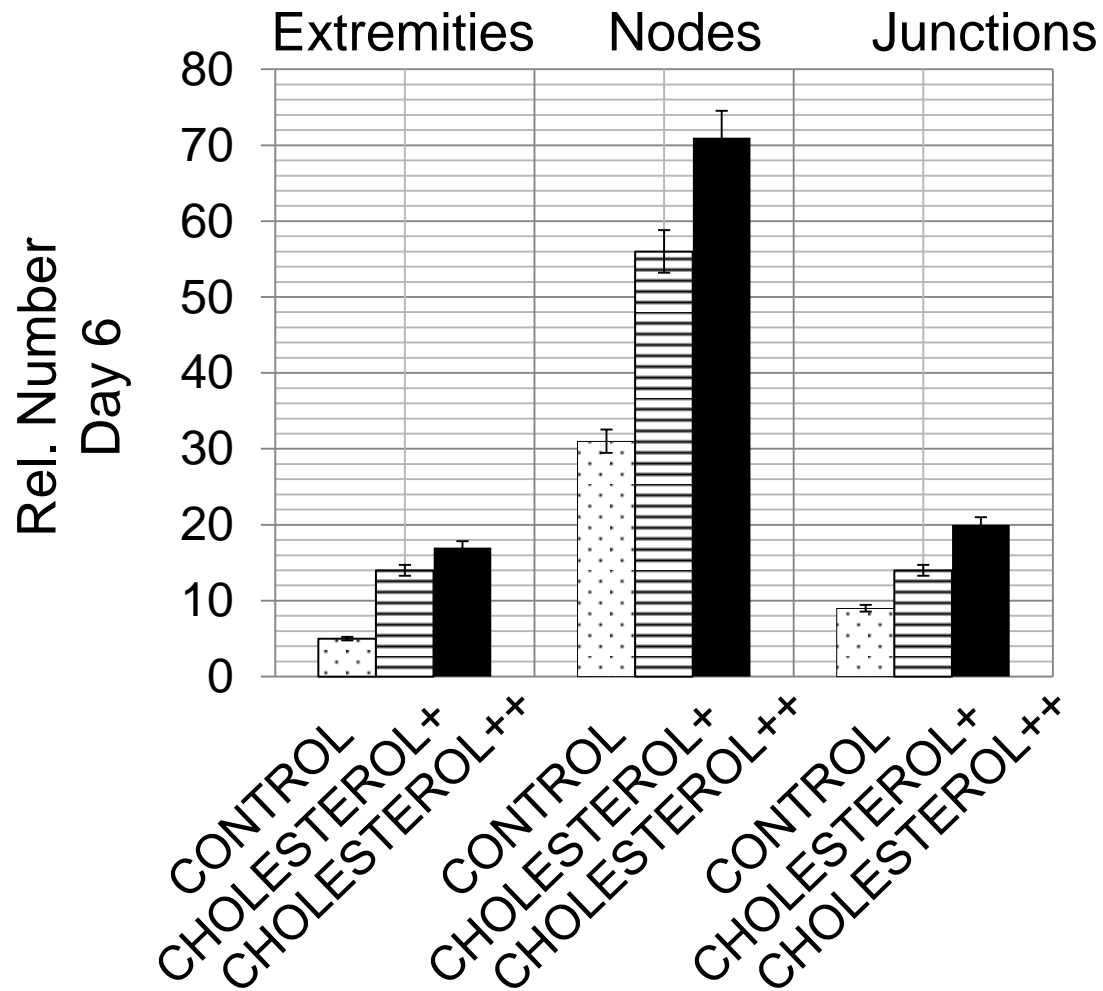

**Figure S2.** Quantitative analysis of vessel morphology. Extremities, nodes, and junctions are shown on control, cholesterol + (55 mg), and cholesterol ++ (110 mg) at day=6 (preincubation day=2 and post-injection day=4).

Figure S3

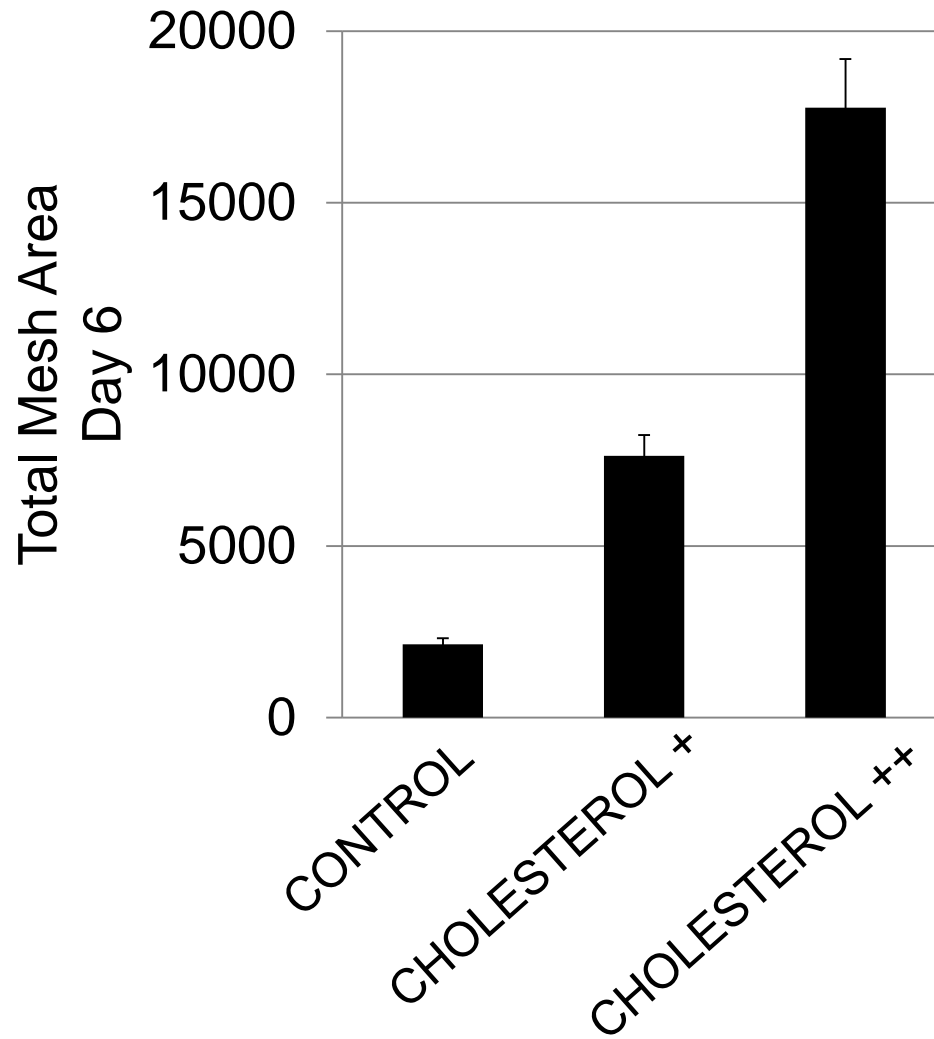

**Figure S3.** Total mesh area was analyzed quantitatively using Angiogenesis Analyzer on control, cholesterol + (55 mg), and cholesterol ++ (110 mg) at day=6 (preincubation day=2 and post-injection day=4).

Figure S4

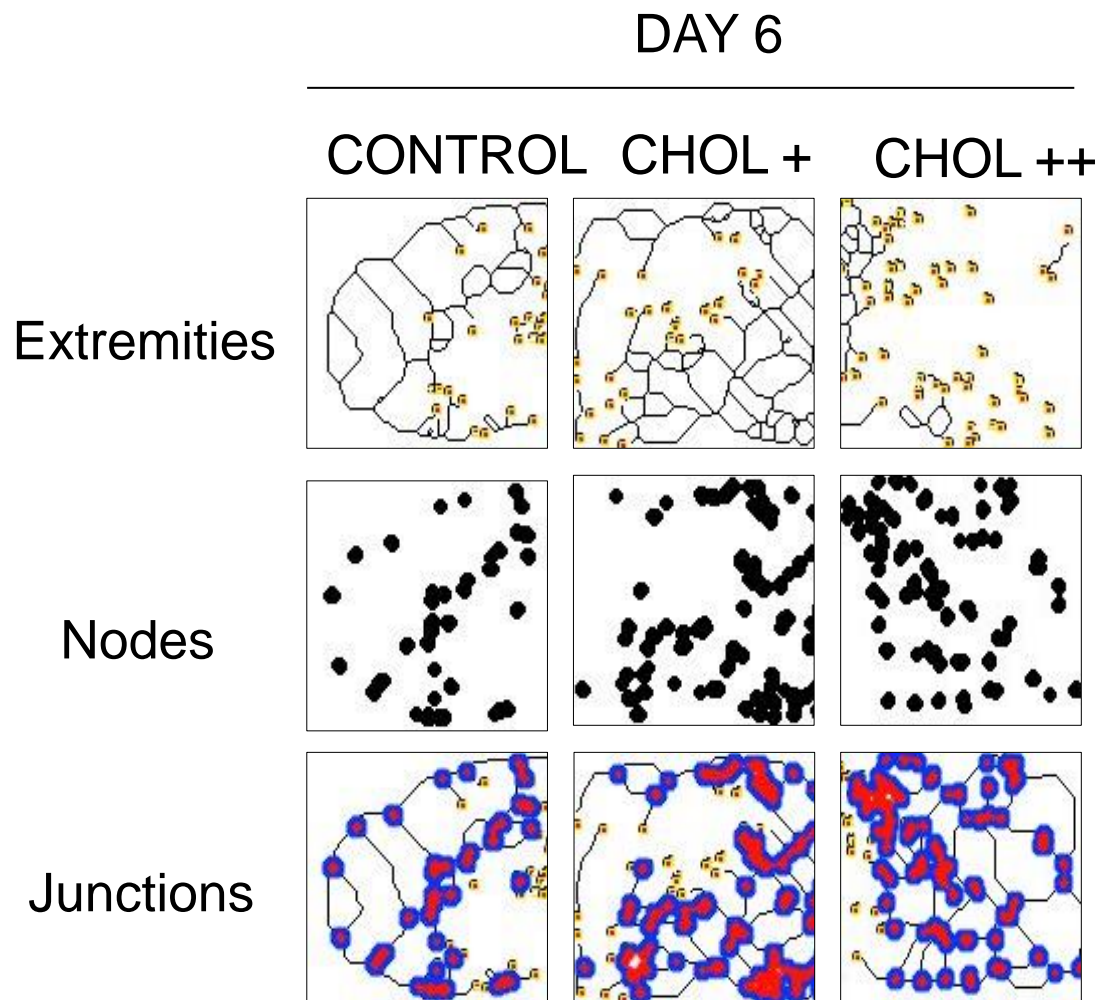

**Figure S4.** Raw data of extremities, nodes, and junctions are shown on control, cholesterol + (55 mg), and cholesterol ++ (110 mg) at day=6 (preincubation day=2 and post-injection day=4).

Figure S5

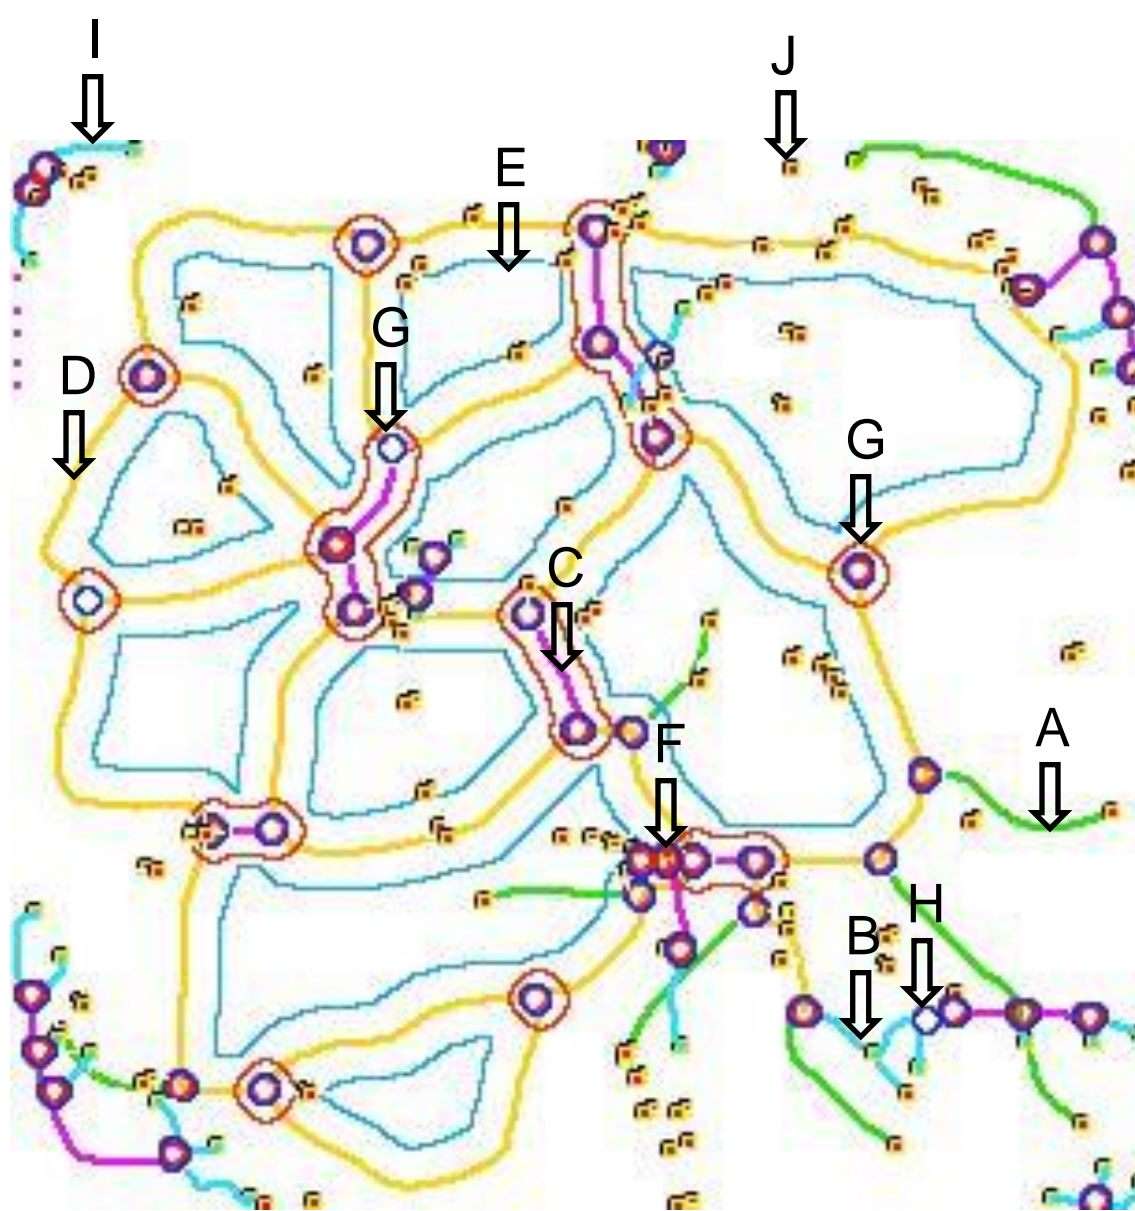

**Figure S5.** Angiogenesis analysis. Each vessel morphology was assigned using the arrows including: (A) green = branches; (B) cyan = twigs; (C) magenta = segments; (D) orange = master segments; (E) sky blue = meshes; (F) red surrounded by blue = nodes surrounded by junction's symbol; (G) junctions surrounded by red = master junctions; (H) blue = isolated elements; (I) cyan = small isolated elements; (J) red surrounded by yellow = extremities.

**SUPPORTING INFORMATION**  
**Table S1**

| Image Name                | Analyzed | Nb extrem | Nb nodes | Nb Junctic | Nb master | Nb master | Tot. maste | Nb meshes | Tot.meshe | Nb peaces | Nb segmei | Nb branch | Nb isol. se | Tot. lengh | Tot. brancl | Tot. segme | Tot. branc | Tot. isol. t | Branching | Mesh inde | Mean Mes | Path |
|---------------------------|----------|-----------|----------|------------|-----------|-----------|------------|-----------|-----------|-----------|-----------|-----------|-------------|------------|-------------|------------|------------|--------------|-----------|-----------|----------|------|
| cholesterol + day 3 (1-t) | 88128    | 8         | 87       | 25         | 11        | 21        | 1628       | 10        | 42094     | 42        | 34        | 8         | 0           | 2009       | 2009        | 1616       | 393        | 0            | 202       | 148       | 4209.4   |      |
| cholesterol + day 3 (1-t) | 88128    | 12        | 42       | 9          | 4         | 5         | 558        | 2         | 4946      | 23        | 11        | 11        | 1           | 1235       | 1170        | 487        | 683        | 65           | 44.273    | 139.5     | 2473     |      |
| cholesterol + day 3 (1-t) | 88128    | 7         | 36       | 13         | 7         | 11        | 856        | 4         | 14469     | 23        | 16        | 7         | 0           | 1263       | 1263        | 769        | 494        | 0            | 109.857   | 122.286   | 3617.2   |      |
| cholesterol + day 3 (1-t) | 88128    | 7         | 23       | 7          | 1         | 2         | 569        | 1         | 4457      | 14        | 7         | 7         | 0           | 998        | 998         | 503        | 495        | 0            | 71.857    | 569       | 4457     |      |
| cholesterol + day 3 (1-t) | 88128    | 4         | 14       | 4          | 1         | 2         | 504        | 1         | 4459      | 8         | 4         | 4         | 0           | 941        | 941         | 474        | 467        | 0            | 118.5     | 504       | 4459     |      |
| cholesterol + day 3 (1-t) | 88128    | 4         | 12       | 4          | 1         | 2         | 503        | 1         | 4446      | 8         | 4         | 4         | 0           | 929        | 929         | 471        | 458        | 0            | 117.75    | 503       | 4446     |      |
| cholesterol + dav 3 (1-t) | 88128    | 4         | 15       | 4          | 1         | 2         | 501        | 1         | 4430      | 8         | 4         | 4         | 0           | 924        | 924         | 472        | 452        | 0            | 118       | 501       | 4430     |      |

**Table S1.** A representative analysis of cholesterol-added vessel morphology using Angiogenesis Analyzer.
